# Supplementary material
Source: Springer Nature journal article supplement (https://www.springermedizin.de/resource/supplementary/12985_2009_576_MOESM6_ESM.pdf/9608488)

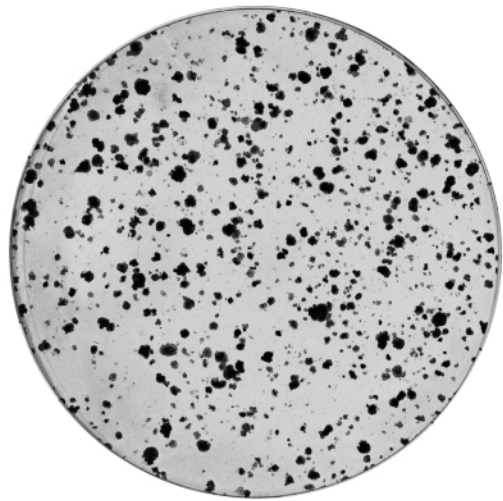

Wild-type

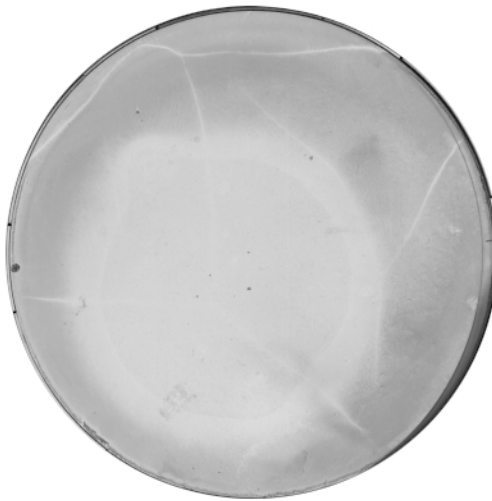

Control

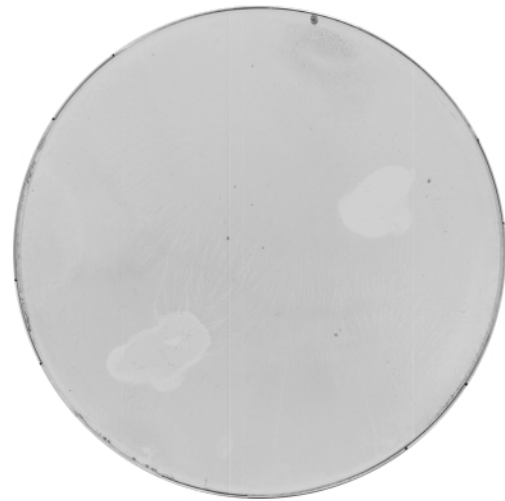

TripleE

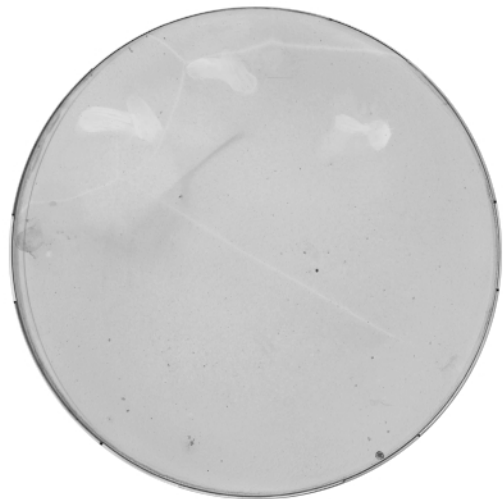

E247

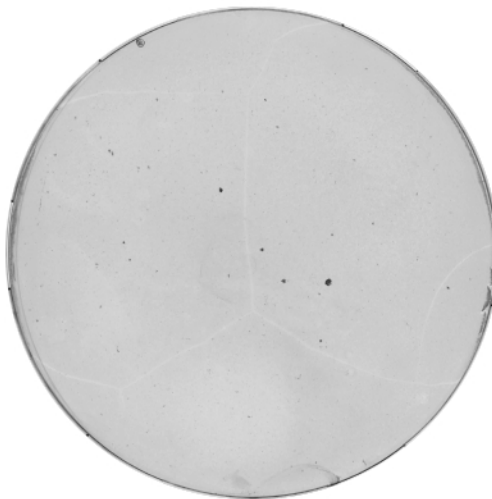

E248

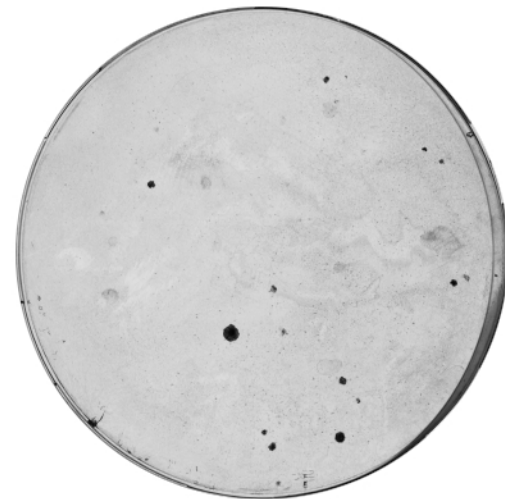

Helix-swop

Supplement: MOESM6 [file 9608488]
